# Supplementary material for: Post-harvest quality control of white quinoa on smartphones using deep learning
Source: Research Square preprint supplement (doi:10.21203/rs.3.rs-8231004/v1), 2025-12-10
Supplement: Supplementary file 1 [file c793a06dcf357fba9da2179f.docx]

**SUPPLEMENTARY MATERIAL**

**Post-harvest quality control of white quinoa on smartphones using deep learning**

Orlando Salazar-Campos a, *, Daniel Tafur-Vera b, Percimil Lecca-Pino b, Javier Moran-Ruiz c,Johonathan Salazar-Campos d

*a Escuela de Ingeniería de Software, Facultad de Ingeniería,* *Universidad San Ignacio de Loyola, Av. La Fontana 550, La Molina, 15024, Perú.*

*b Ingeniería de Sistemas Computacionales, Universidad Privada Del Norte, Mz. G Lote 24 Urb. Dean Saavedra – Trujillo, Perú.*

*c Escuela de Ingeniería Industrial y Comercial, Facultad de Ingeniería, Universidad San Ignacio de Loyola, Av. la Fontana 550, La Molina, 15024, Perú.*

*d ETSI Agronómica, Alimentaria y de Biosistemas, Universidad Politécnica de Madrid,* [*Av. Puerta de Hierro, 2, Moncloa - Aravaca, 28040 Madrid*](https://www.google.com/maps/place/data=!4m2!3m1!1s0xd422839e67a50ff:0xaab5c8af11062a4d?sa=X&ved=1t:8290&ictx=111)*, España.*

Supplementary Material for the Manuscript: " Post-harvest quality control of white quinoa on smartphones using deep learning"

**Table S1**

Dataset architecture.

**Table S2**

Protocol for computational efficiency measurement on Android.

**Table S3**

Resultados por pliegue del desempeño del AVS en tamaño, defecto y categoría: exactitud (IC 95 % de Wilson), F1_macro y MCC (bootstrap).

**Table S4**

Agreement (κ ± 95 % CI) between the AVS and reference methods.

**Table S5**

Decision criteria of the compared methods.

**Table S6**

Calibration metrics before and after TS.

**Table S1**

Dataset architecture.

| Element | Valor |
| --- | --- |
| SUs (images 3024×3024 px) | 3000 |
| ROIs (grains) | 390000 (120–140 per SU) |
| Labels per ROI | Size XG/G/M/S; Defect a–e |
| Category per sample | Derived from GE, GR, GI, GC, I thresholds in Peruvian Technical Standard NTP 011.462:2025 |
| Training | 2400 SUs (312000 ROIs) |
| Validation | 600 SUs (78000 ROIs) |
| Partitioning strategy | Iterative stratification and grouping by SU (no data leakage) |
| Balancing policy | No over- or under-sampling; natural distribution preserved |

**Table S2**

Protocol for computational efficiency measurement on Android.

| Parameter | Description | Configuration / Value |
| --- | --- | --- |
| Test device | Mid-range Android smartphone | Samsung Galaxy S9 Plus, Snapdragon 845, Dual Pixel 12 MP F1.5/F2.4 |
| Inference framework | TensorFlow Lite with NNAPI | TFLite 2.13.0, NNAPI preferred, CPU fallback |
| Model | Multitask CNN exported to .tflite | MobileNet_v1_0.50_224, batch 1, FP32 |
| On-device pre-processing | OpenCV 4.8.0 | BGR to RGB, bilinear resize 64×64 to 224×224, normalisation [0 1] |
| Measurement scenario | Per-grain inference | Local execution, no image transmission |
| Repetitions | Total 20 (5 warm-up + 15 effective) | 5 warm-ups and 15 effective measurements |
| Recorded metrics | Latency (ms), memory usage (MB) | p50 and p95 reports |
| Model traceability | Integrity hash (SHA-256 checksSU of .tflite file) | SHA-256 on .tflite file |
| NSUerical tolerance (desktop–mobile) | Max absolute difference ≤ 1×10⁻⁶ in logits and probabilities | ≤ 1 × 10⁻⁶ in logits and probabilities |
| Resource release | Persistent interpreter with explicit buffer release | Intérprete persistente con liberación explícita de buffers post-inferencias |

**Table S3**

Per-fold performance of the AVS for size, defect and category tasks.

| Task | Metric | Fold 1 | Fold 2 | Fold 3 | Fold 4 | Fold 5 | Mean | 95 % CI |
| --- | --- | --- | --- | --- | --- | --- | --- | --- |
| Size | Accuracy | 0.890 | 0.950 | 0.910 | 0.970 | 0.960 | 0.936 | [0.904, 0.958] |
| F1_macro | 0.881 | 0.952 | 0.903 | 0.971 | 0.959 | 0.933 | [0.899, 0.960] |
| MCC | 0.855 | 0.934 | 0.883 | 0.960 | 0.947 | 0.916 | [0.876, 0.947] |
| Defect | Accuracy | 0.910 | 0.890 | 0.930 | 0.970 | 0.940 | 0.928 | [0.906, 0.952] |
| F1_macro | 0.867 | 0.852 | 0.894 | 0.951 | 0.888 | 0.890 | [0.866, 0.927] |
| MCC | 0.841 | 0.845 | 0.898 | 0.960 | 0.915 | 0.892 | [0.855, 0.924] |
| Category | Accuracy | 0.940 | 0.960 | 0.970 | 0.950 | 0.960 | 0.956 | [0.931, 0.979] |
| F1_macro | 0.921 | 0.945 | 0.967 | 0.925 | 0.947 | 0.941 | [0.913, 0.965] |
| MCC | 0.900 | 0.951 | 0.969 | 0.914 | 0.949 | 0.937 | [0.900, 0.970] |

**Table S4**

Agreement (κ ± 95 % CI) between the AVS and reference methods.

| Comparison | n (SUs/grains) | κ (mean) | 95% CI | Note |
| --- | --- | --- | --- | --- |
| AVS vs HSUan (Size) | 100 SUs | 0.053 | [−0.154, 0.056] | Two-rater consensus |
| AVS vs Sieve (Size) | 100 SUs | 0.007 | [−0.102, 0.126] | NTP thresholds |
| AVS vs HSUan (Category) | 100 SUs | 0.167 | [−0.250, −0.080] | Rule-based categories |
| HSUan vs Sieve (Size) | 100 SUs | 0.042 | [−0.074, 0.157] | Control comparison |

**Table S5**

Decision criteria of the compared methods.

| Method | Dominant variable | Decision nature |
| --- | --- | --- |
| Sieves | Absolute physical diameter | Deterministic threshold-based |
| Human visual inspection | Perceptual heuristic based on experience (subjective) | Subjective |
| AVS (proposed) | Morphological aggregation with rule-based engine (NTP) | Deterministic by proportion and dominance |

**Table S6**

Calibration metrics before and after TS.

| Task | ECE before | ECE after | MCE before | MCE after | Brier before | Brier after | Log-loss before | Log-loss after |
| --- | --- | --- | --- | --- | --- | --- | --- | --- |
| Size | 0.061 [0.048–0.075] | 0.028 [0.020–0.036] | 0.180 [0.142–0.221] | 0.112 [0.086–0.138] | 0.061 [0.055–0.067] | 0.057 [0.052–0.063] | 0.196 [0.177–0.215] | 0.181 [0.165–0.198] |
| Defect | 0.094 [0.078–0.111] | 0.052 [0.041–0.064] | 0.232 [0.191–0.272] | 0.153 [0.123–0.182] | 0.083 [0.075–0.090] | 0.076 [0.069–0.083] | 0.278 [0.255–0.301] | 0.252 [0.231–0.273] |
| Category | 0.048 [0.037–0.059] | 0.023 [0.016–0.030] | 0.164 [0.129–0.199] | 0.103 [0.081–0.125] | 0.048 [0.043–0.053] | 0.045 [0.040–0.050] | 0.169 [0.153–0.185] | 0.157 [0.143–0.172] |
